# Supplementary material for: iTRAQ-Based Protein Profiling Provides Insights into the Mechanism of Light-Induced Anthocyanin Biosynthesis in Chrysanthemum (Chrysanthemum × morifolium)
Source: MDPI journal article supplement (doi:10.3390/genes10121024), 2019-12-09
Supplement: s1 [file s1]

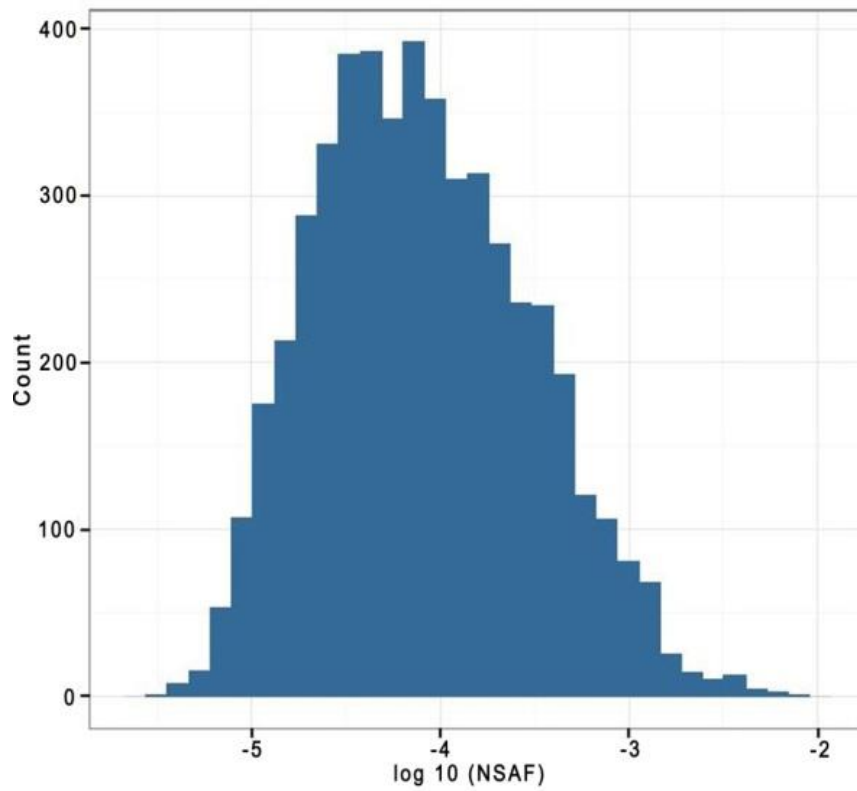

**Figure S1.** Distribution pattern of the raw proteins identified in the present study based on their expressive abundance. NSAF, normalized spectral abundance factor.
